# Supplementary material for: Symmetric sodium-ion batteries based on the phosphate material of NASICON-structured Na3Co0.5Mn0.5Ti(PO4)3
Source: Royal Society of Chemistry journal article supplement (doi:10.1039/c7ra05214f), 2017-01-01
Supplement: c7ra05214f1.pdf [file c7ra05214f1.pdf]

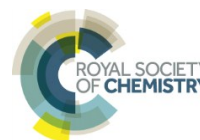

# Electronic Supplementary Information (ESI) for RSC Advances

---

## Supporting Information

### Symmetric sodium-ion batteries based on the phosphate material of NASICON-structured $\text{Na}_3\text{Co}_{0.5}\text{Mn}_{0.5}\text{Ti}(\text{PO}_4)_3$

Hongbo Wang,<sup>a</sup> Chao Chen,<sup>b</sup> Chao Qian,<sup>\*a</sup> Chengdu Liang<sup>a</sup> and Zhan Lin<sup>\*ab</sup>

<sup>a</sup>Key Laboratory of Biomass Chemical Engineering of Ministry of Education, College of  
Chemical and Biological Engineering, Zhejiang University, Hangzhou 310027, P. R. China

<sup>b</sup>College of Light Industry and Chemical Engineering, Guangdong University of Technology,  
Guangzhou 510006, P. R. China

\*E-mail: qianchao@zju.edu.cn and zhanlin@zju.edu.cn

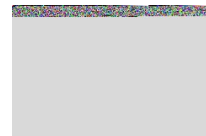

**Table S1.** Crystallographic data of  $\text{Na}_3\text{Co}_{0.5}\text{Mn}_{0.5}\text{Ti}(\text{PO}_4)_3$  from Rietveld refinement. Reliability factors of the Rietveld refinement for the XRD pattern:  $R_p = 2.45\%$ ,  $R_{wp} = 3.11\%$ , and  $\text{CHI}^2 = 0.82$ .

| Atom  | Wyckoff site | x        | y        | z        | Occupancy |
|-------|--------------|----------|----------|----------|-----------|
| Na(1) | 6b           | 0.000000 | 0.000000 | 0.000000 | 0.9128    |
| Na(2) | 18e          | 0.633451 | 0.000000 | 0.250000 | 0.7178    |
| Co(1) | 12c          | 0.000000 | 0.000000 | 0.149509 | 0.2500    |
| Mn(1) | 12c          | 0.000000 | 0.000000 | 0.149509 | 0.2500    |
| Ti(1) | 12c          | 0.000000 | 0.000000 | 0.149509 | 0.5000    |
| P(1)  | 18e          | 0.302500 | 0.000000 | 0.250000 | 1.0000    |
| O(1)  | 36f          | 0.040017 | 0.208490 | 0.196016 | 1.0000    |
| O(2)  | 36f          | 0.192015 | 0.178041 | 0.085161 | 1.0000    |

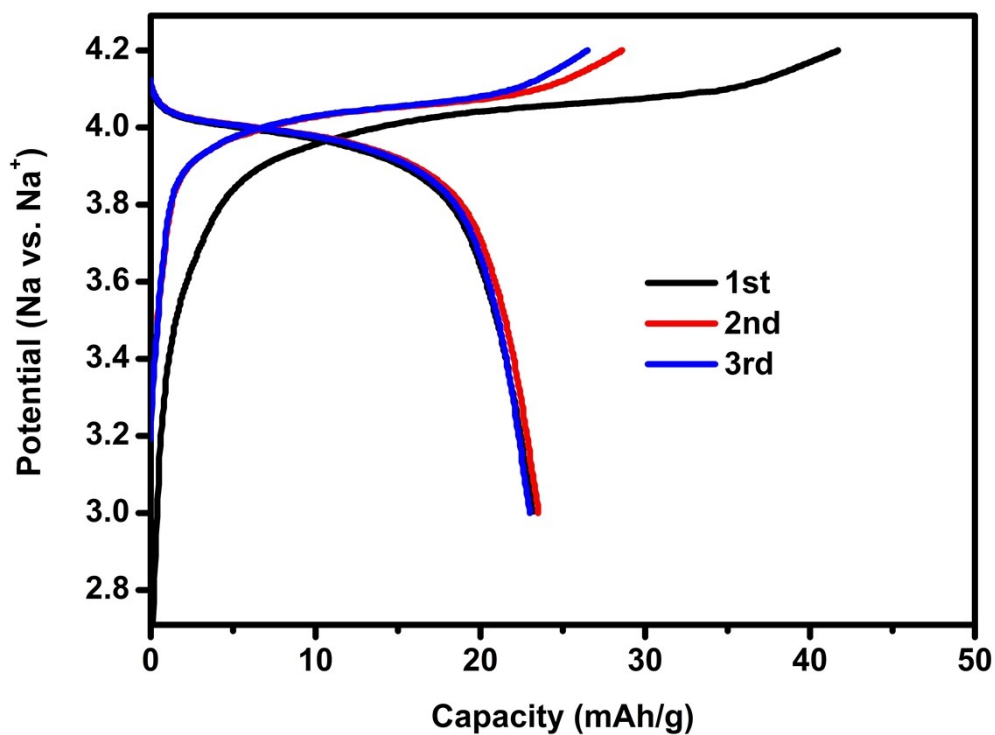

**Figure S1.** Typical charge/discharge profiles of  $\text{Na}_3\text{CoTi}(\text{PO}_4)_3$  electrode in the voltage of 3.0-4.2 V at a current rate of 0.1 C.

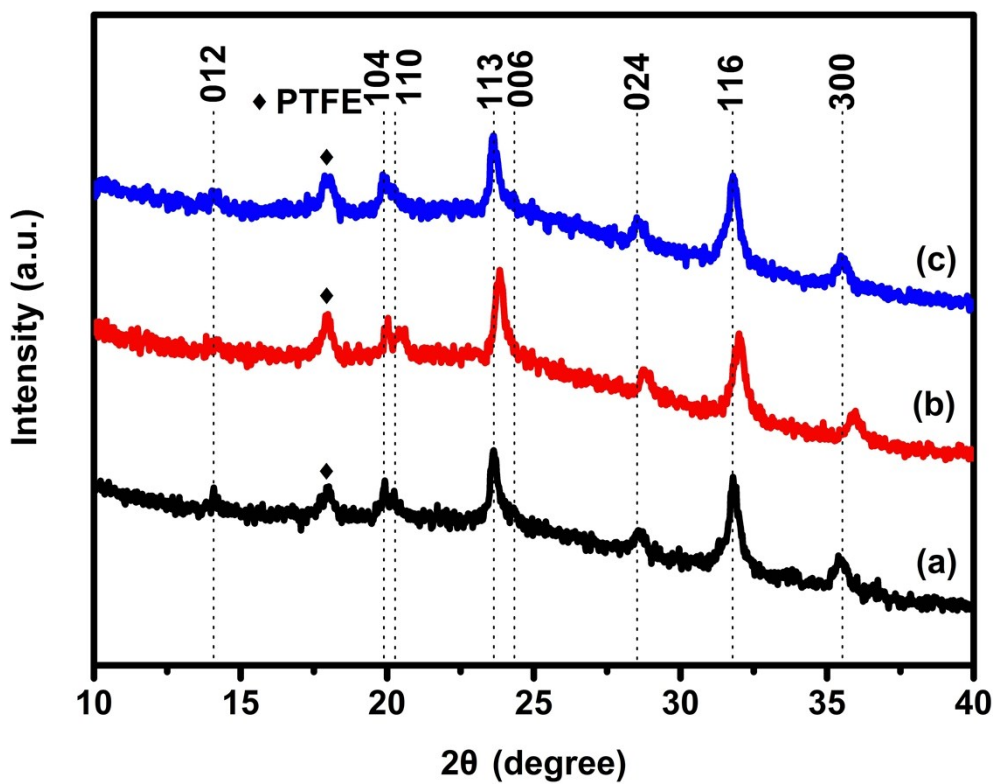

**Figure S2.** Ex-situ XRD patterns of  $\text{Na}_3\text{Co}_{0.5}\text{Mn}_{0.5}\text{Ti}(\text{PO}_4)_3$  as cathode at the pristine state (a), charged to 4.2 V (b), and discharged to 2.8 V (c).

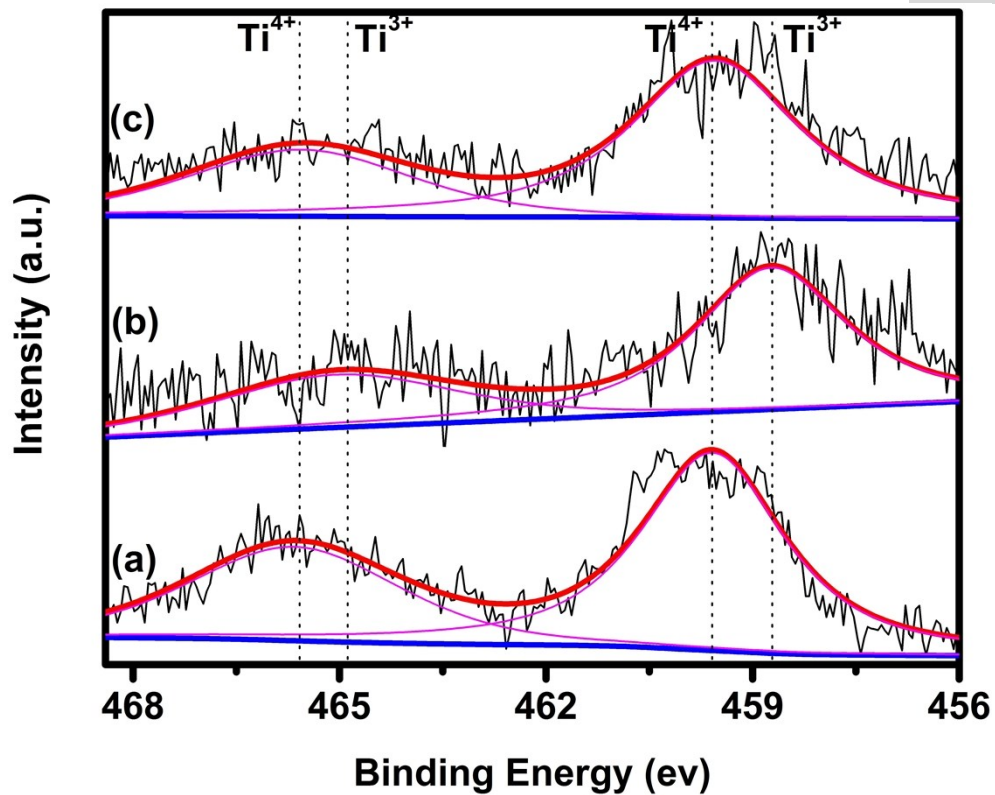

**Figure S3.** XPS spectra of Ti 2p when  $\text{Na}_3\text{Co}_{0.5}\text{Mn}_{0.5}\text{Ti}(\text{PO}_4)_3$  was used as anode at the pristine state (a), discharged to 1.5 V (b), and charged to 3.0 V (c).

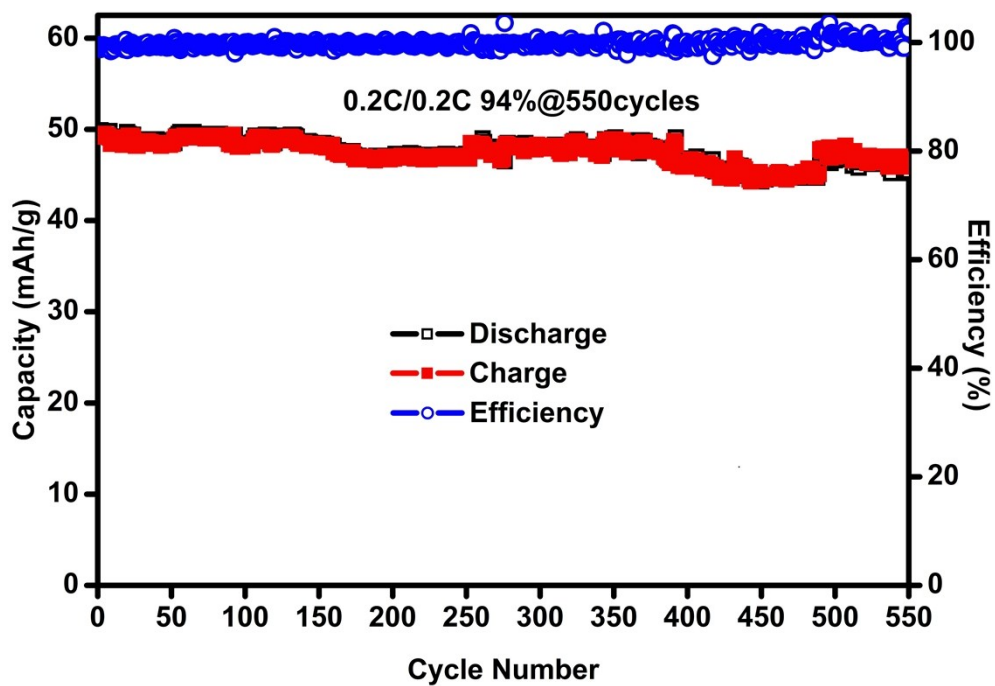

**Figure S4.** Cycling performance of  $\text{Na}_3\text{Co}_{0.5}\text{Mn}_{0.5}\text{Ti}(\text{PO}_4)_3$  electrode as anode with corresponding coulombic efficiency over 550 cycles at a rate of 0.2 C in half-cell system.

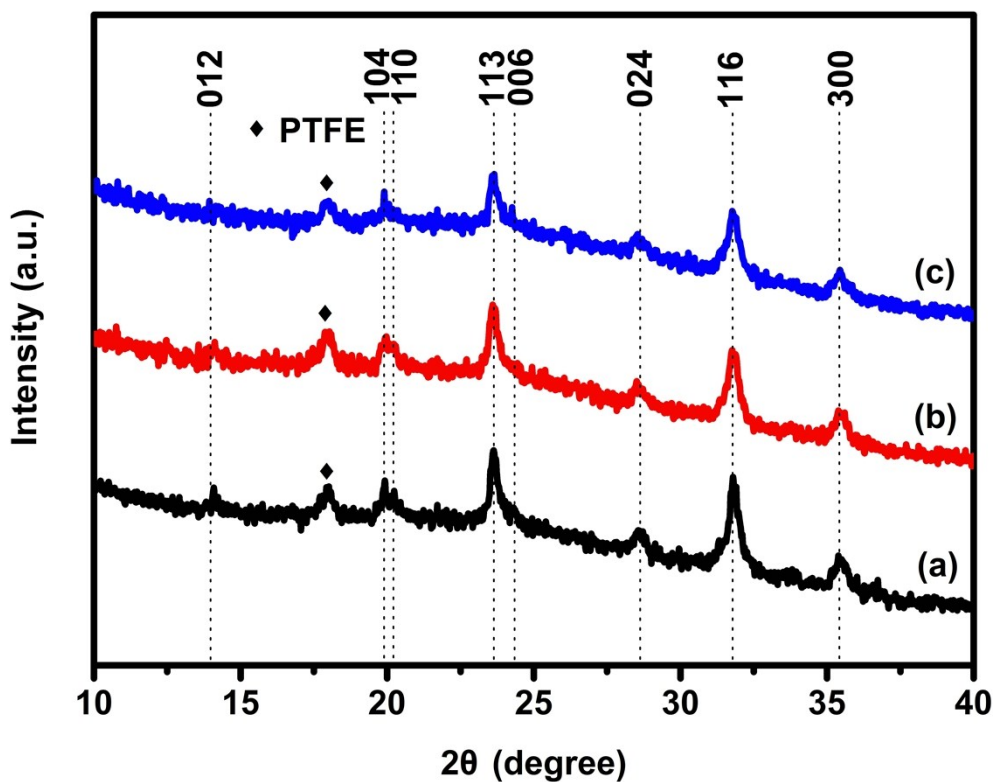

**Figure S5.** Ex-situ XRD patterns of  $\text{Na}_3\text{Co}_{0.5}\text{Mn}_{0.5}\text{Ti}(\text{PO}_4)_3$  as anode at the pristine state (a), discharged to 1.6 V (b), and charged to 2.8 V (c).
